# Supplementary material for: Variations in COVID-19 Vaccine Attitudes and Acceptance among Refugees and Lebanese Nationals Pre- and Post-Vaccine Rollout in Lebanon
Source: MDPI journal article supplement (doi:10.3390/vaccines10091533), 2022-09-15
Supplement: s1 [file s1]

**Supplementary Table S1.** Intention to receive vaccine by HBM domains, social norms and vaccine knowledge in univariate analysis.

|                                 | <b>Survey 1</b>    |          | <b>Survey 2</b>    |          |
|---------------------------------|--------------------|----------|--------------------|----------|
|                                 | <b>OR (95% CI)</b> | <b>p</b> | <b>OR (95% CI)</b> | <b>p</b> |
| <b>Gender</b>                   |                    | 0.189    |                    | 0.032    |
| Female                          | Ref                |          | Ref                |          |
| Male                            | 1.10 (0.95-1.28)   |          | 1.14 (1.0-1.29)    |          |
| <b>Age Category</b>             |                    | 0.175    |                    | 0.004    |
| 18-30 years                     | Ref                |          | Ref                |          |
| 31-50 years                     | 1.07 (0.91-1.27)   |          | 1.25 (1.07-1.45)   |          |
| ≥51 years                       | 1.20 (0.99-1.45)   |          | 1.97 (1.68-2.32)   |          |
| <b>Nationality</b>              |                    | 0.043    |                    | <0.001   |
| Lebanese                        | Ref                |          | Ref                |          |
| Refugees                        | 0.86 (0.74-1.00)   |          | 0.36 (0.32-0.41)   |          |
| <b>Perceived Susceptibility</b> | 1.80 (1.70-1.91)   | <0.001   | 2.25 (2.13-2.37)   | <0.001   |
| <b>Perceived Severity</b>       | 2.66 (2.27-3.10)   | <0.001   | 5.34 (4.60-6.21)   | <0.001   |
| <b>Perceived Benefits</b>       | 5.85 (5.17-6.63)   | <0.001   | 4.47 (4.10-4.87)   | <0.001   |
| <b>Perceived Barriers</b>       | 0.51 (0.49-0.54)   | <0.001   | 0.47 (0.45-0.49)   | <0.001   |
| <b>Cues to Action</b>           | 5.77 (5.00-6.65)   | <0.001   | 5.96 (5.27-6.74)   | <0.001   |
| <b>Social Norms</b>             | 4.06 (3.60-4.59)   | <0.001   | 3.28 (2.96-3.63)   | <0.001   |
| <b>Knowledge</b>                | 1.23 (1.18-1.27)   | <0.001   | 1.54 (1.47-1.62)   | <0.001   |

**Supplementary Table S2.** Participant responses to HBM domain questions, stratified by nationality (Lebanese vs. refugees) in survey 1 (February 2021).

|                                                                                                                                                                 | Lebanese<br>n(%)<br>N=1,850 |                |                | Refugees<br>n(%)<br>N=2,077 |                |               | p      |
|-----------------------------------------------------------------------------------------------------------------------------------------------------------------|-----------------------------|----------------|----------------|-----------------------------|----------------|---------------|--------|
| Domain                                                                                                                                                          | Yes                         | Unsure         | No             | Yes                         | Unsure         | No            |        |
| <b>Perceived Susceptibility</b>                                                                                                                                 |                             |                |                |                             |                |               |        |
| I do not need to receive the vaccine because I have good health                                                                                                 | 713<br>(38.5)               | 467<br>(25.2)  | 670<br>(36.2)  | 1068<br>(51.4)              | 467<br>(22.5)  | 542<br>(26.1) | <0.001 |
| I do not need to receive the vaccine if had been infected with COVID-19 and recovered                                                                           | 521<br>(28.2)               | 595<br>(32.2)  | 734<br>(39.7)  | 729<br>(35.1)               | 677<br>(32.6)  | 671<br>(32.3) | <0.001 |
| <b>Perceived Severity</b>                                                                                                                                       |                             |                |                |                             |                |               |        |
| I am not at risk of severe complications of COVID-19 so I will not take the vaccine                                                                             | 783<br>(42.3)               | -              | 1067<br>(57.7) | 1114<br>(53.6)              | -              | 963<br>(46.4) | <0.001 |
| <b>Perceived Benefit</b>                                                                                                                                        |                             |                |                |                             |                |               |        |
| I think the COVID-19 vaccine is safe                                                                                                                            | 291<br>(15.7)               | 924<br>(50.0)  | 635<br>(34.3)  | 317<br>(15.3)               | 994<br>(47.9)  | 766<br>(36.9) | 0.246  |
| I think the COVID-19 vaccine is effective                                                                                                                       | 311<br>(16.8)               | 1005<br>(54.3) | 534<br>(28.9)  | 307<br>(14.8)               | 1130<br>(54.4) | 640<br>(30.8) | 0.149  |
| <b>Perceived Barrier</b>                                                                                                                                        |                             |                |                |                             |                |               |        |
| I don't trust COVID-19 vaccine because it was developed in a short period of time                                                                               | 1206<br>(65.2)              | -              | 644<br>(34.8)  | 1418<br>(68.3)              | -              | 659<br>(31.7) | 0.041  |
| I think COVID-19 vaccine would change your DNA                                                                                                                  | 522<br>(28.2)               | 894<br>(48.2)  | 434<br>(23.5)  | 465<br>(22.4)               | 1227<br>(59.1) | 385<br>(18.5) | <0.001 |
| I am concerned about side effects or risks of the vaccine                                                                                                       | 1307<br>(70.7)              | 351<br>(19.0)  | 192<br>(10.4)  | 1497<br>(72.1)              | 376<br>(18.1)  | 204<br>(9.8)  | 0.613  |
| I think the side effects of the COVID-19 vaccine are very serious/could lead to death                                                                           | 758<br>(41.0)               | 792<br>(42.8)  | 300<br>(16.2)  | 900<br>(43.3)               | 873<br>(42.0)  | 304<br>(14.6) | 0.221  |
| The COVID-19 vaccine will not succeed because the virus keeps changing                                                                                          | 891<br>(48.2)               | 691<br>(37.4)  | 268<br>(14.5)  | 996<br>(48.0)               | 814<br>(39.2)  | 267<br>(12.9) | 0.249  |
| <b>Cues to Action</b>                                                                                                                                           |                             |                |                |                             |                |               |        |
| I would be more comfortable getting the vaccine if I saw neighbors, community leaders, religious leaders, doctors, celebrities, politicians receive the vaccine | 727<br>(39.3)               | 552<br>(29.8)  | 571<br>(30.9)  | 896<br>(43.1)               | 563<br>(27.1)  | 618<br>(29.8) | 0.039  |
| <b>Social Norms</b>                                                                                                                                             |                             |                |                |                             |                |               |        |
| Most people I know are going to receive the vaccine                                                                                                             | 230<br>(12.4)               | 766<br>(41.4)  | 854<br>(46.2)  | 263<br>(12.7)               | 951<br>(45.8)  | 863<br>(41.6) | 0.011  |

**Supplementary Table S3.** Participant responses to HBM domain questions, stratified by nationality (Lebanese vs. refugees) in survey 2 (June 2021).

|                                                                                                                                                                 | <b>Lebanese<br/>n(%)<br/>N=1,950</b> |               |                | <b>Refugees<br/>n(%)<br/>N=2,224</b> |                |                |        |
|-----------------------------------------------------------------------------------------------------------------------------------------------------------------|--------------------------------------|---------------|----------------|--------------------------------------|----------------|----------------|--------|
| <b>Domain</b>                                                                                                                                                   | <b>Yes</b>                           | <b>Unsure</b> | <b>No</b>      | <b>Yes</b>                           | <b>Unsure</b>  | <b>No</b>      |        |
| <b>Perceived Susceptibility</b>                                                                                                                                 |                                      |               |                |                                      |                |                |        |
| I do not need to receive the vaccine because I have good health                                                                                                 | 466<br>(23.9)                        | 285<br>(14.6) | 1199<br>(61.5) | 938<br>(42.2)                        | 357<br>(16.1)  | 929<br>(41.8)  | <0.001 |
| I do not need to receive the vaccine if had been infected with COVID-19 and recovered                                                                           | 356<br>(18.3)                        | 394<br>(20.2) | 1200<br>(61.5) | 601<br>(27.0)                        | 572<br>(25.7)  | 1051<br>(47.3) | <0.001 |
| <b>Perceived Severity</b>                                                                                                                                       |                                      |               |                |                                      |                |                |        |
| I am not at risk of severe complications of COVID-19 so I will not take the vaccine                                                                             | 494<br>(25.3)                        | -             | 1456<br>(74.7) | 920<br>(41.4)                        | -              | 1304<br>(58.6) | <0.001 |
| <b>Perceived Benefit</b>                                                                                                                                        |                                      |               |                |                                      |                |                |        |
| I think the COVID-19 vaccine is safe                                                                                                                            | 907<br>(46.5)                        | 802<br>(41.1) | 241<br>(12.4)  | 691<br>(31.1)                        | 1113<br>(50.0) | 420<br>(18.9)  | <0.001 |
| I think the COVID-19 vaccine is effective                                                                                                                       | 837<br>(42.9)                        | 884<br>(45.3) | 229<br>(11.7)  | 652<br>(29.3)                        | 1181<br>(53.1) | 391<br>(17.6)  | <0.001 |
| <b>Perceived Barrier</b>                                                                                                                                        |                                      |               |                |                                      |                |                |        |
| I don't trust COVID-19 vaccine because it was developed in a short period of time                                                                               | 718<br>(36.8)                        | -             | 1232<br>(63.2) | 1177<br>(52.9)                       | -              | 1047<br>(47.1) | <0.001 |
| I think COVID-19 vaccine would change your DNA                                                                                                                  | 199<br>(10.2)                        | 940<br>(43.1) | 911<br>(46.7)  | 323<br>(14.5)                        | 1059<br>(47.6) | 842<br>(37.9)  | <0.001 |
| I am concerned about side effects or risks of the vaccine                                                                                                       | 768<br>(39.4)                        | 565<br>(29.0) | 617<br>(31.6)  | 1366<br>(61.4)                       | 482<br>(21.7)  | 376<br>(16.9)  | <0.001 |
| I think the side effects of the COVID-19 vaccine are very serious/could lead to death                                                                           | 342<br>(17.5)                        | 835<br>(42.8) | 773<br>(39.6)  | 656<br>(29.5)                        | 931<br>(41.9)  | 637<br>(28.6)  | <0.001 |
| The COVID-19 vaccine will not succeed because the virus keeps changing                                                                                          | 401<br>(20.6)                        | 875<br>(44.9) | 674<br>(34.6)  | 605<br>(27.2)                        | 1055<br>(47.4) | 564<br>(25.4)  | <0.001 |
| <b>Cues to Action</b>                                                                                                                                           |                                      |               |                |                                      |                |                |        |
| I would be more comfortable getting the vaccine if I saw neighbors, community leaders, religious leaders, doctors, celebrities, politicians receive the vaccine | 1205<br>(61.8)                       | 414<br>(21.2) | 331<br>(17.0)  | 1148<br>(51.6)                       | 581<br>(26.1)  | 495<br>(22.3)  | <0.001 |
| <b>Social Norms</b>                                                                                                                                             |                                      |               |                |                                      |                |                |        |
| Most people I know are going to receive the vaccine                                                                                                             | 595<br>(30.5)                        | 921<br>(47.2) | 434<br>(22.3)  | 325<br>(14.6)                        | 1162<br>(52.3) | 737<br>(33.1)  | <0.001 |
